# Supplementary material for: Drosophila Interspecific Hybrids Phenocopy piRNA-Pathway Mutants
Source: PubMed Central journal article supplement (PMC3506263; doi:10.1371/journal.pbio.1001428), 2012-11-20

A)

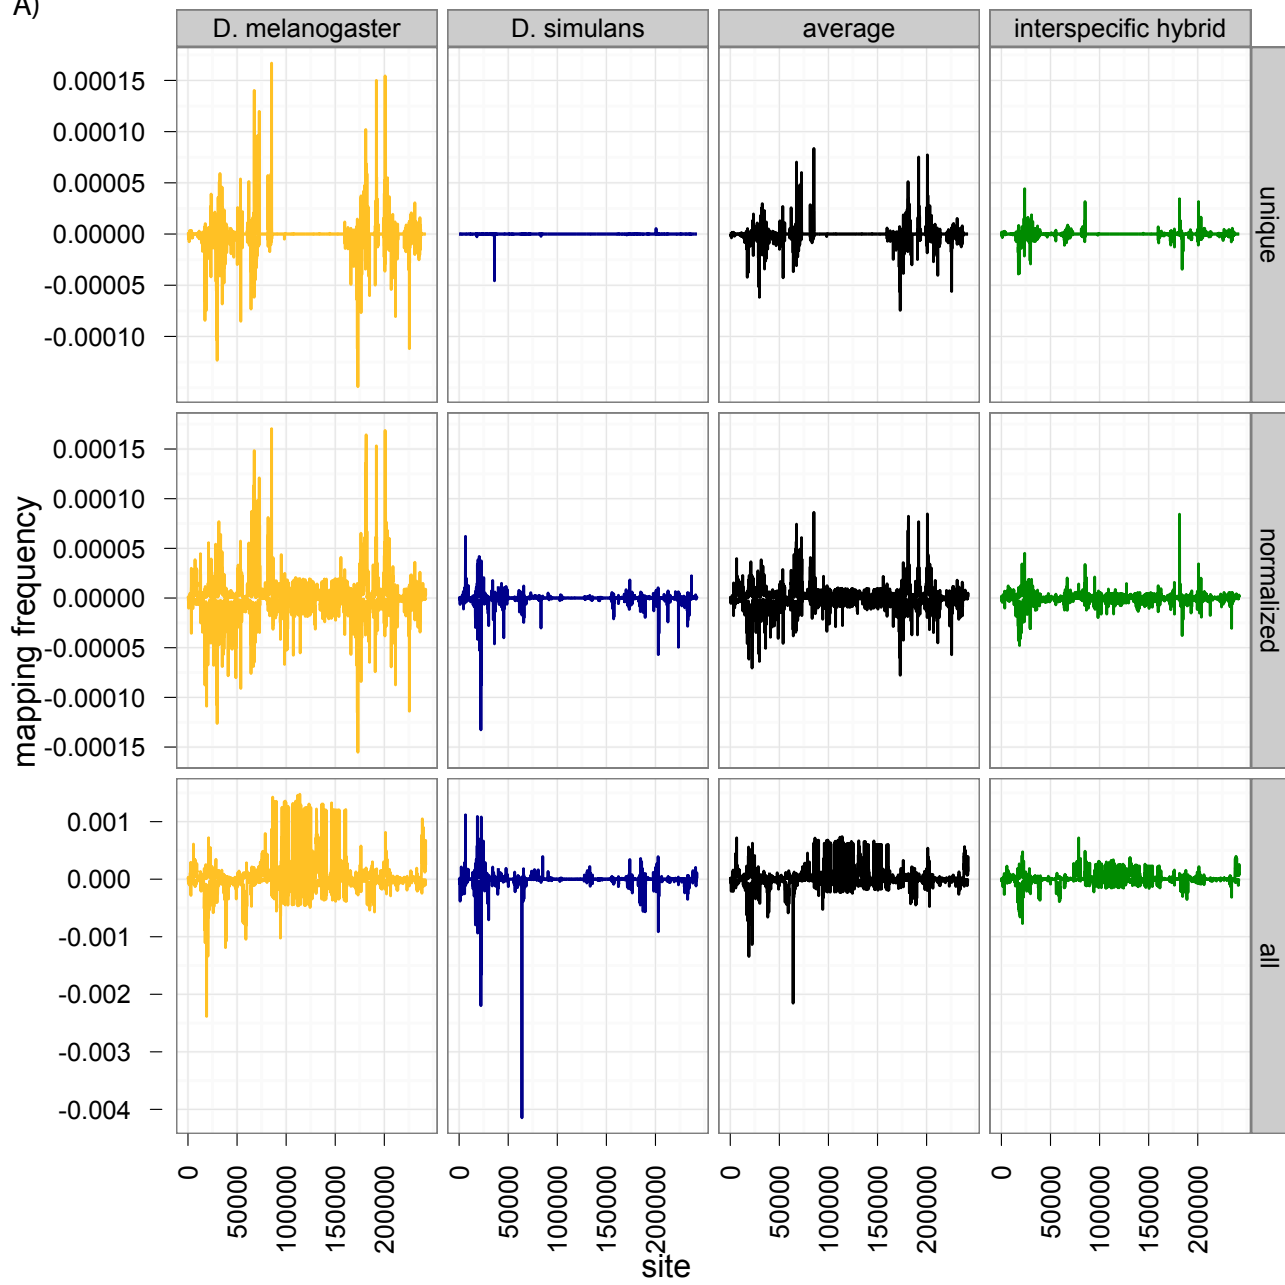

B)

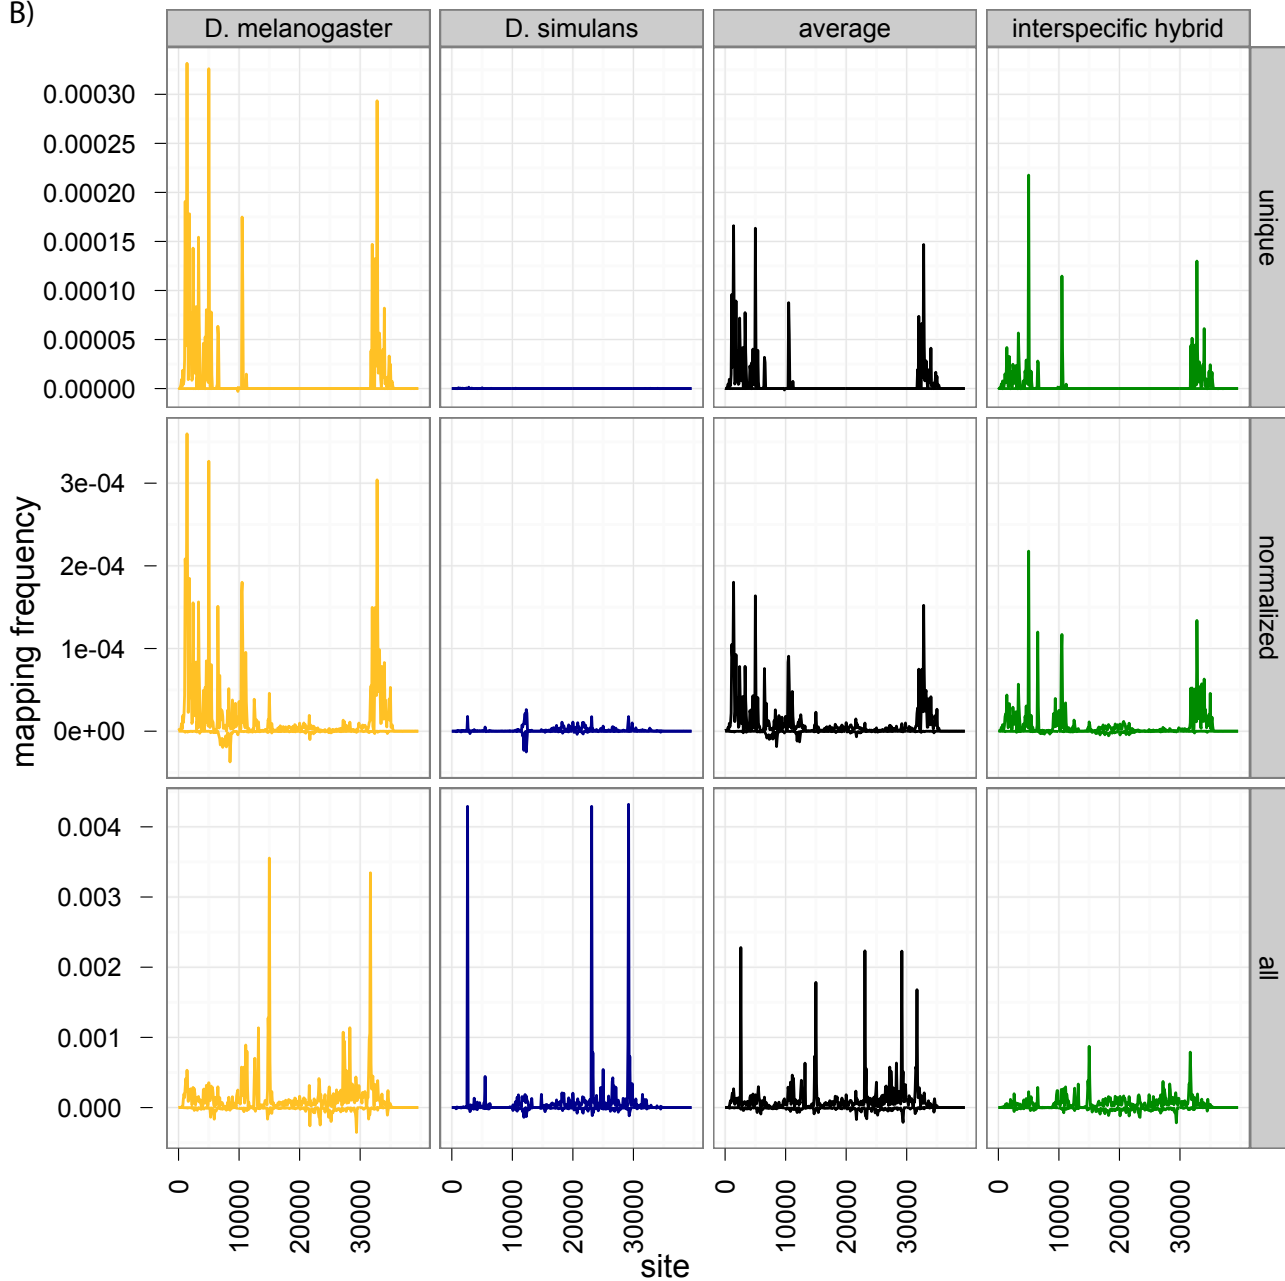

B)



B)



C)

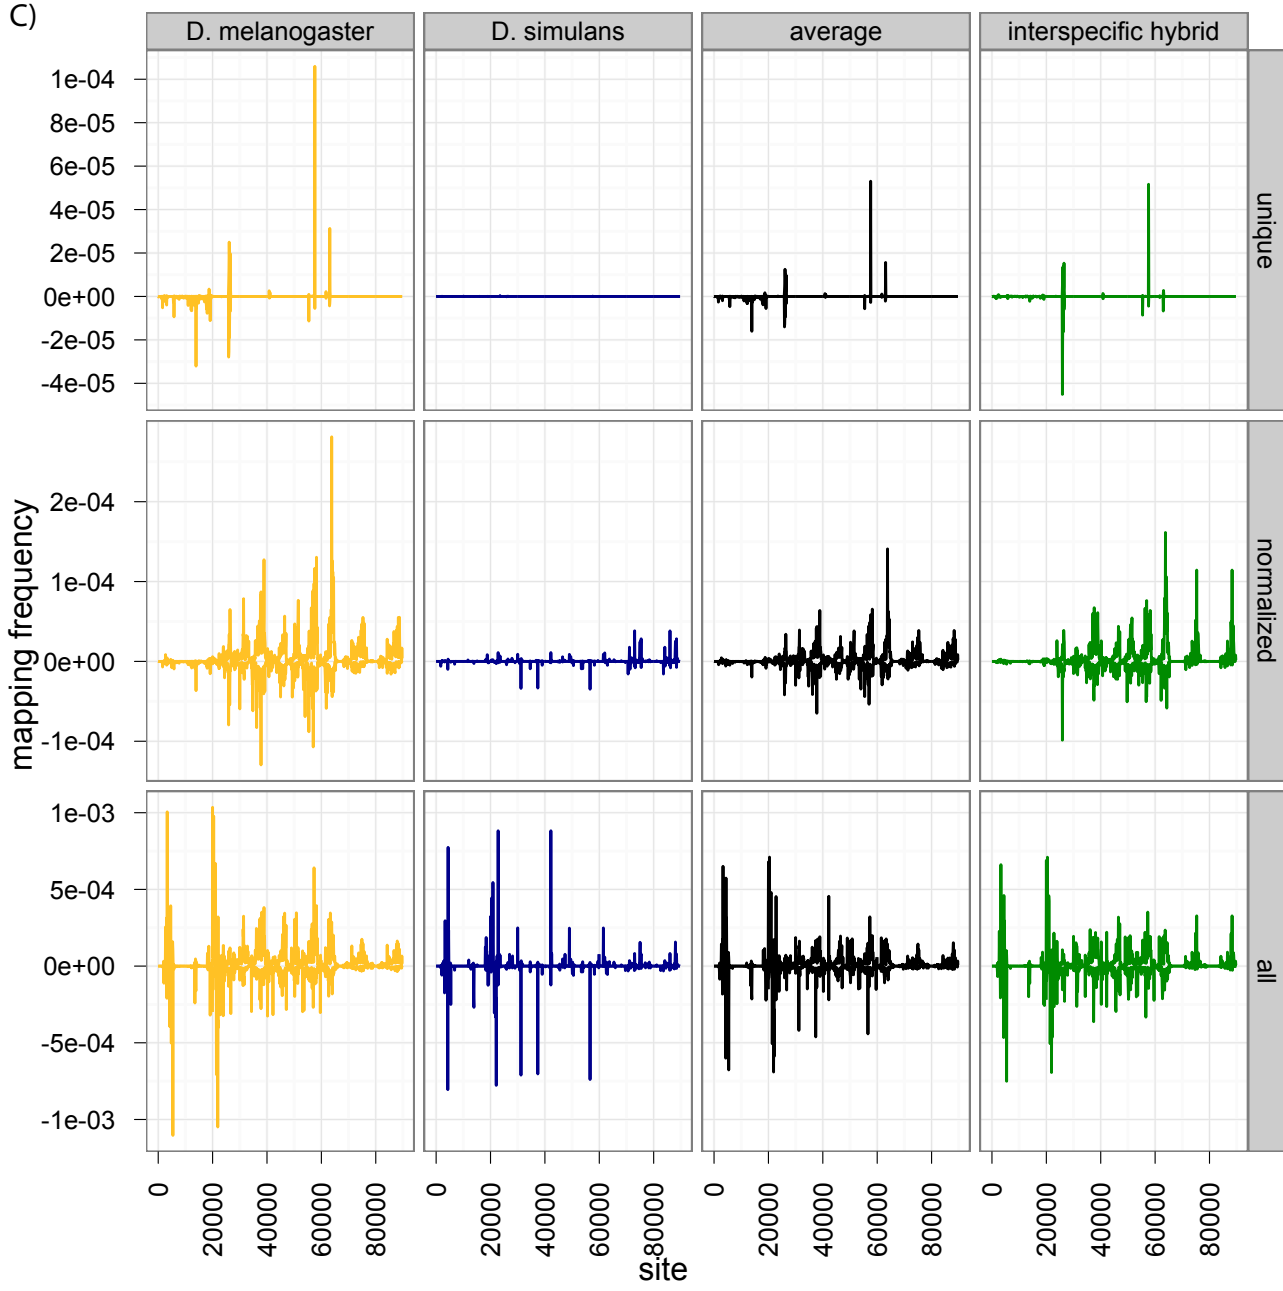

D)

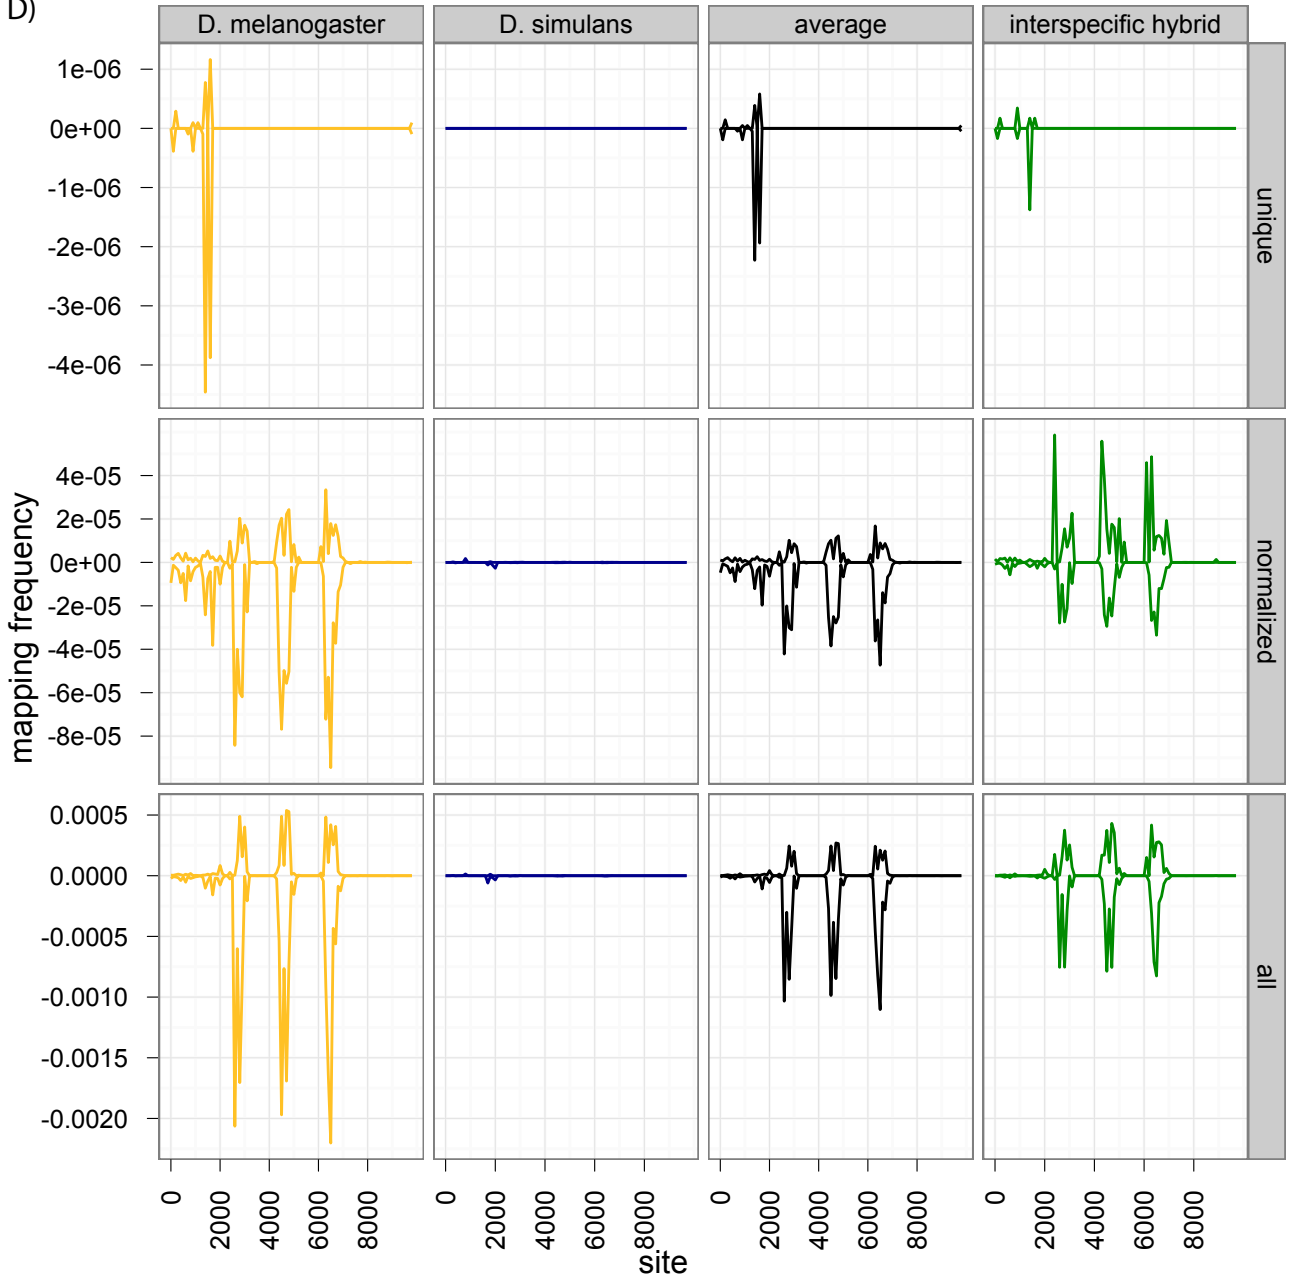

E)

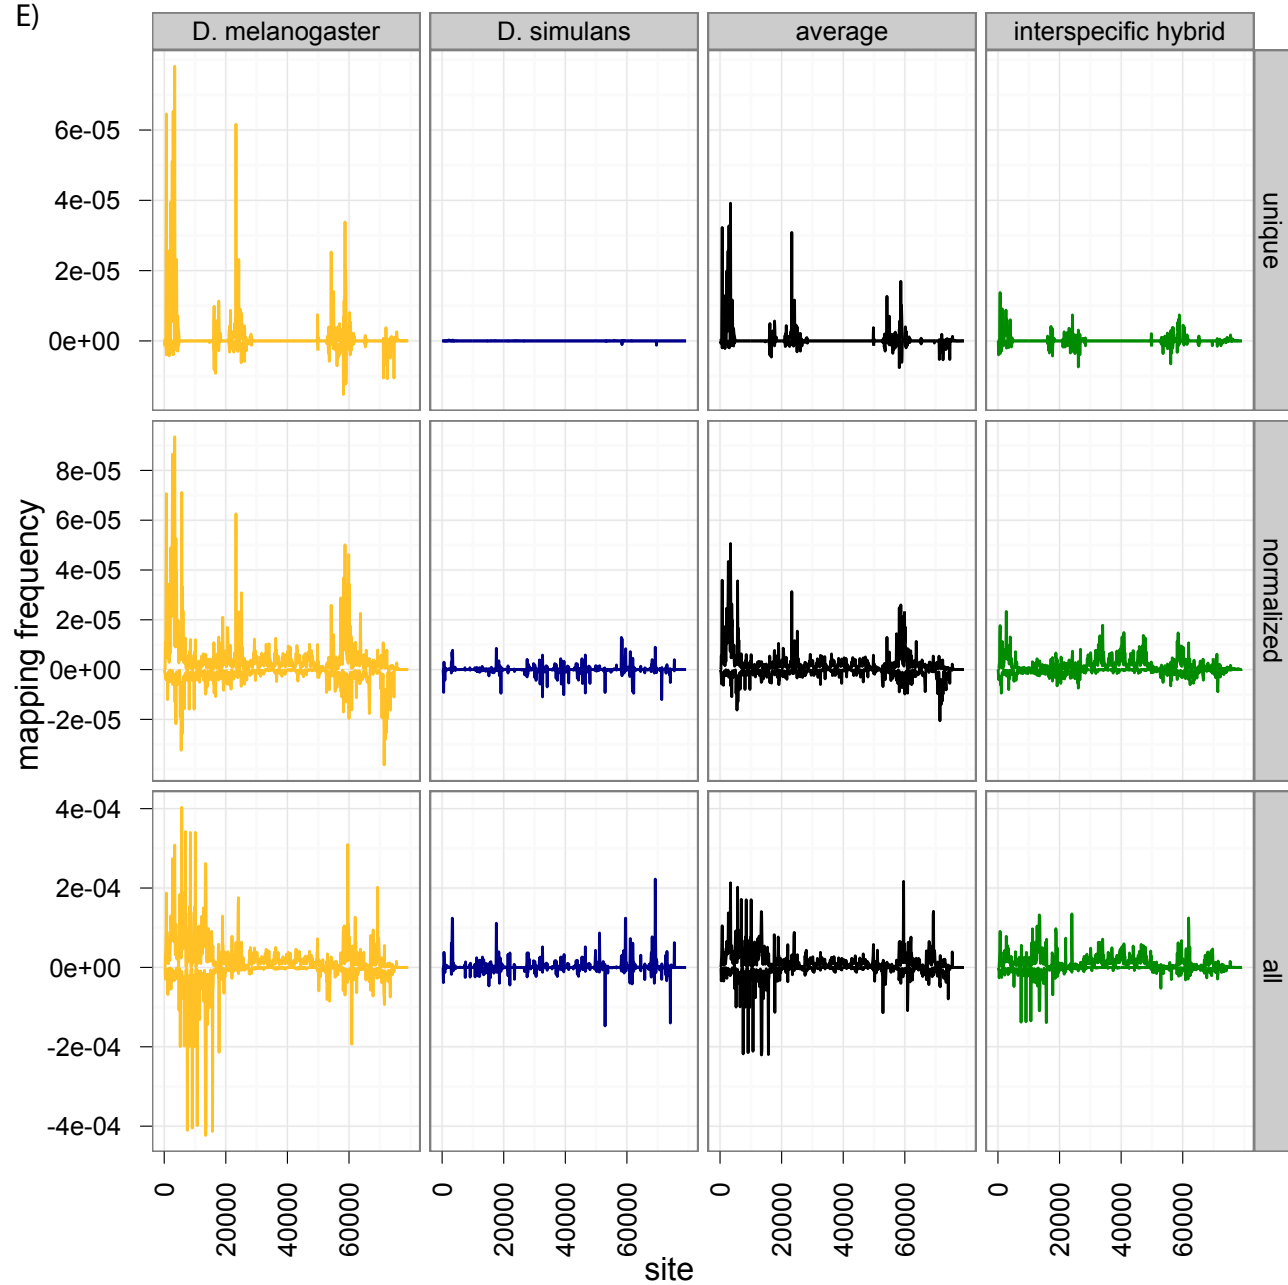

E)





F)

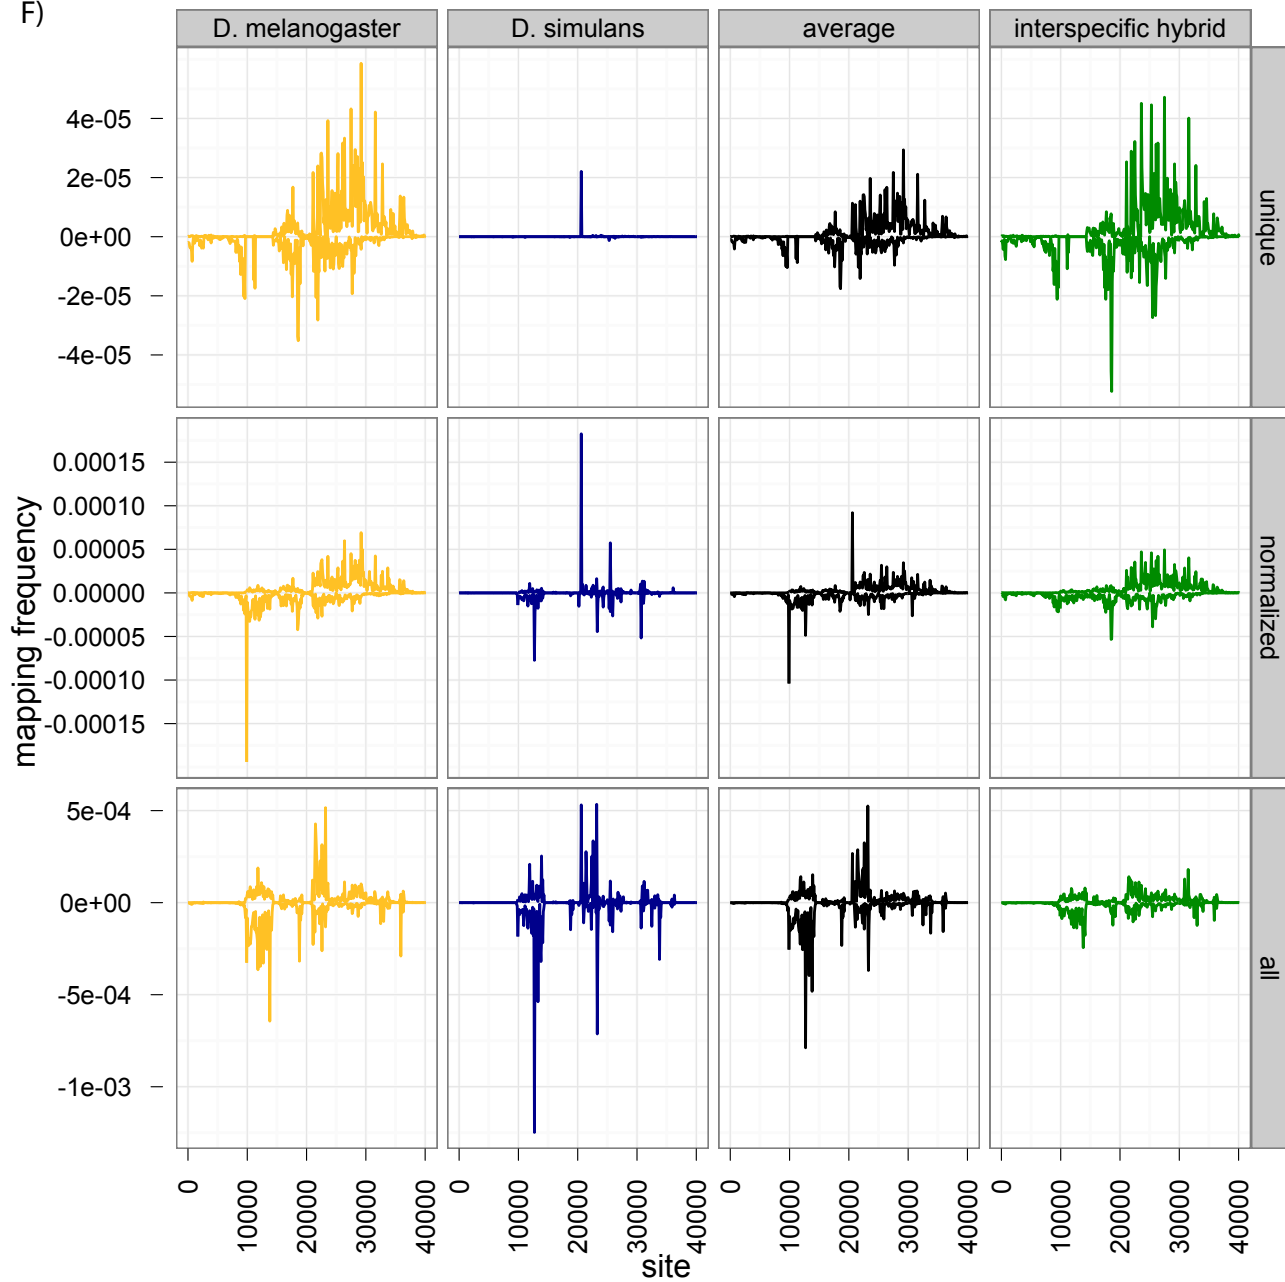

G)

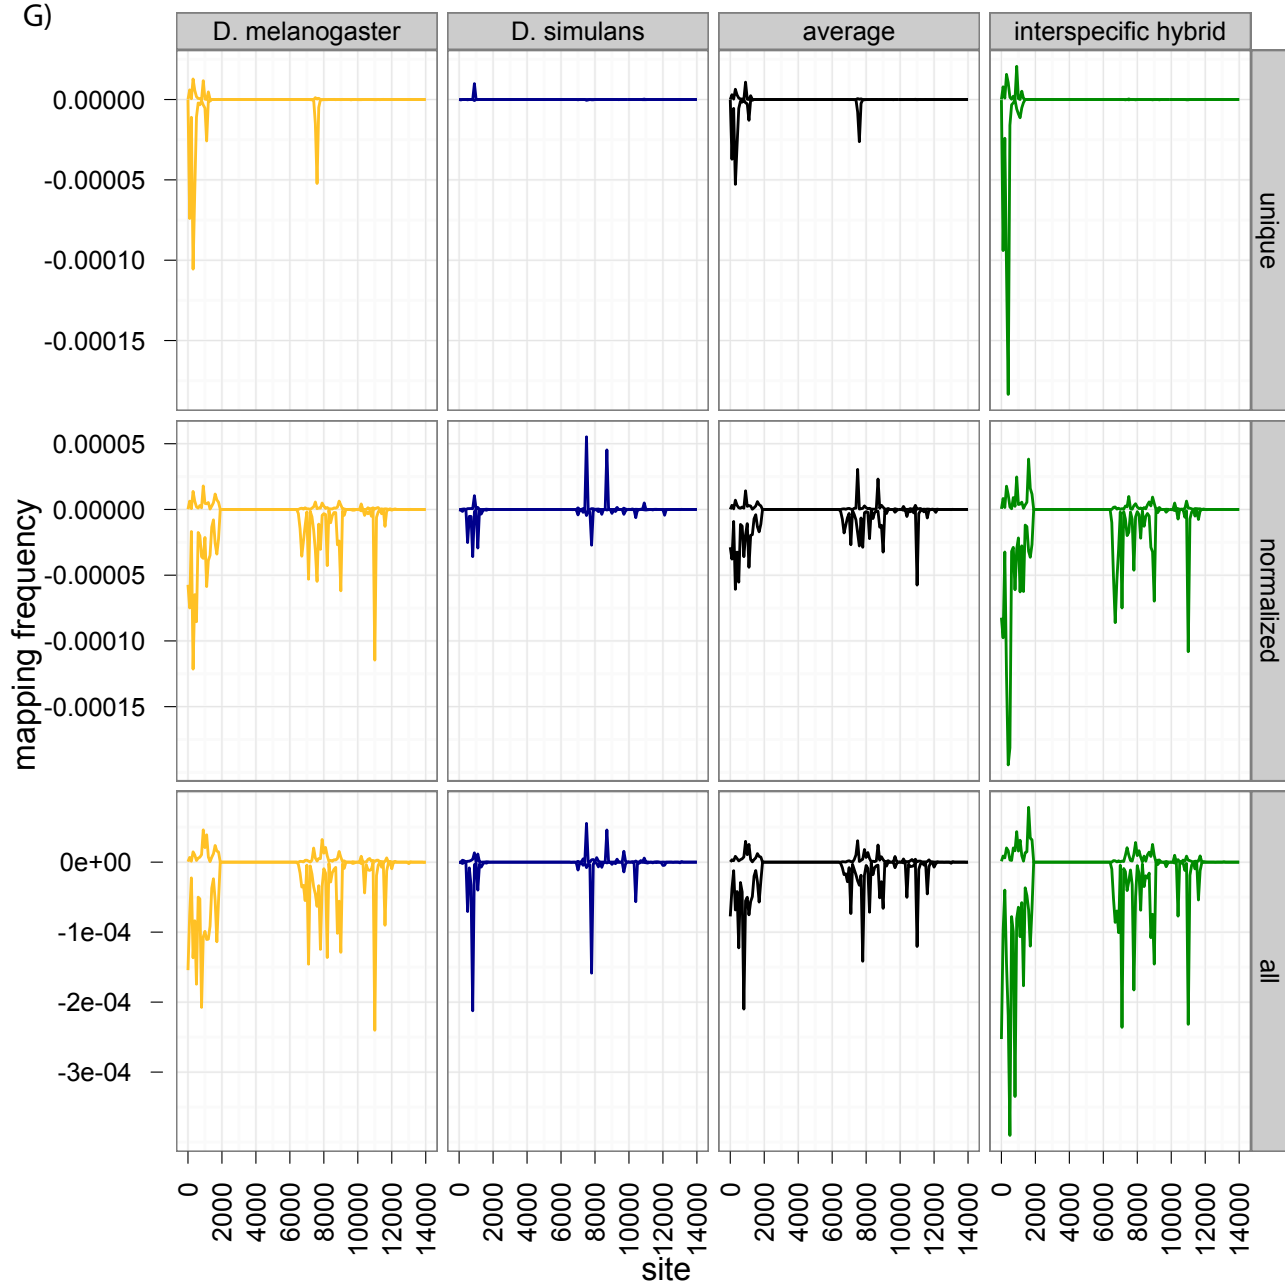

H)

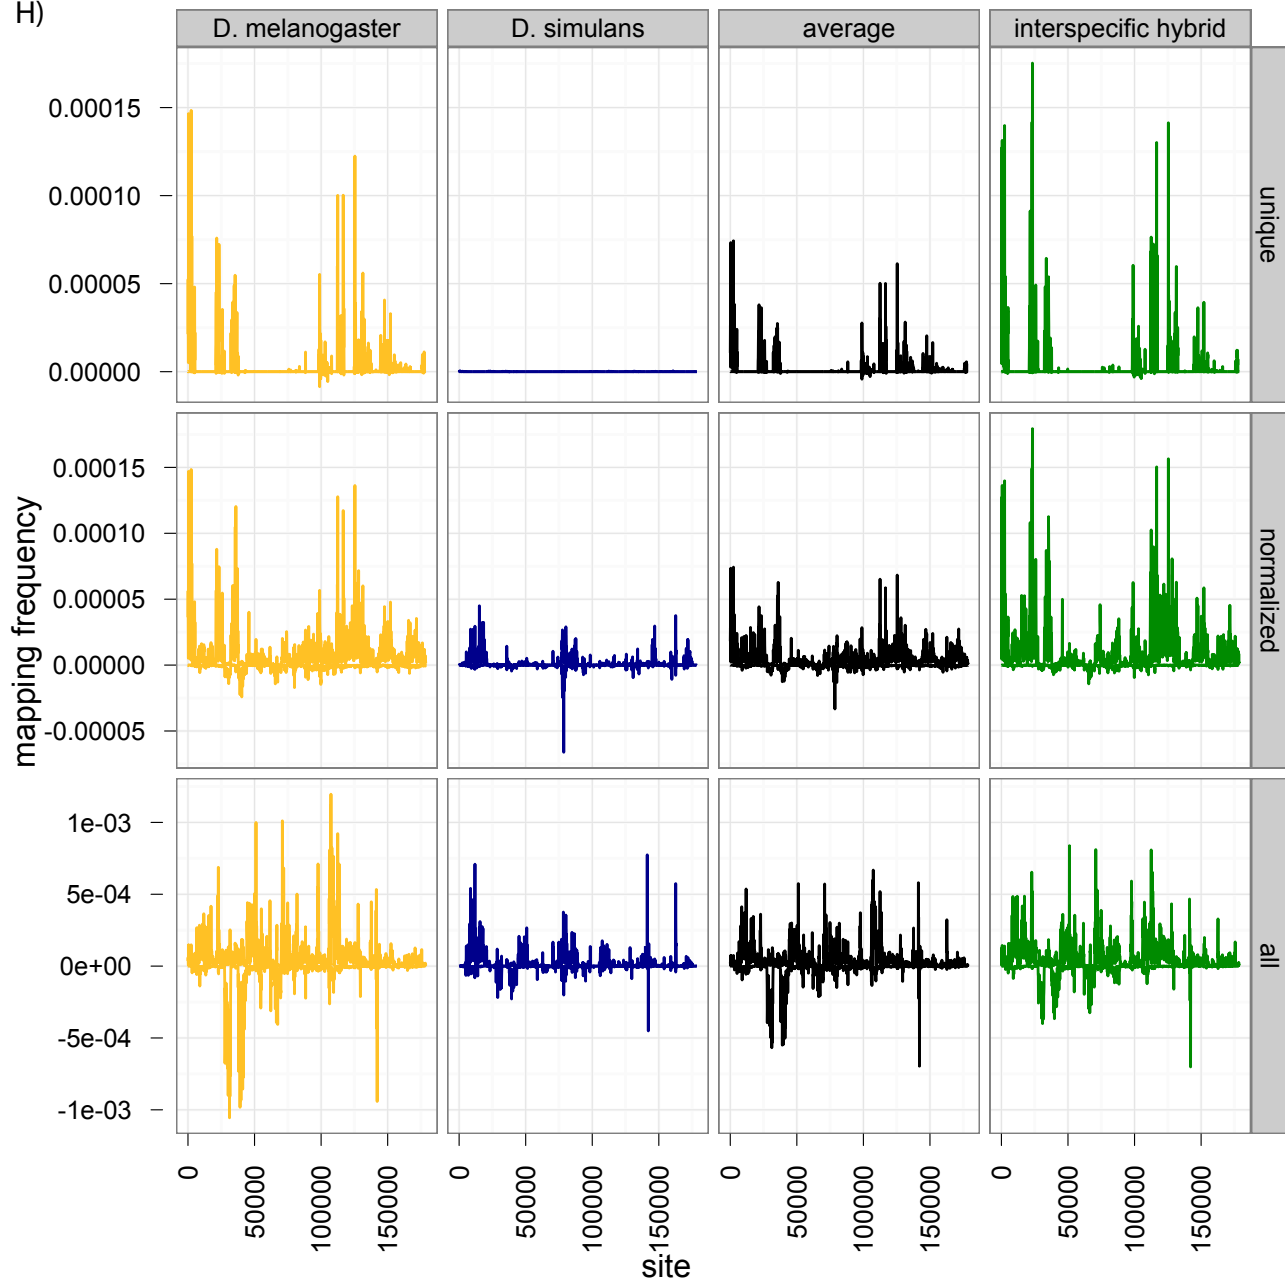

i)

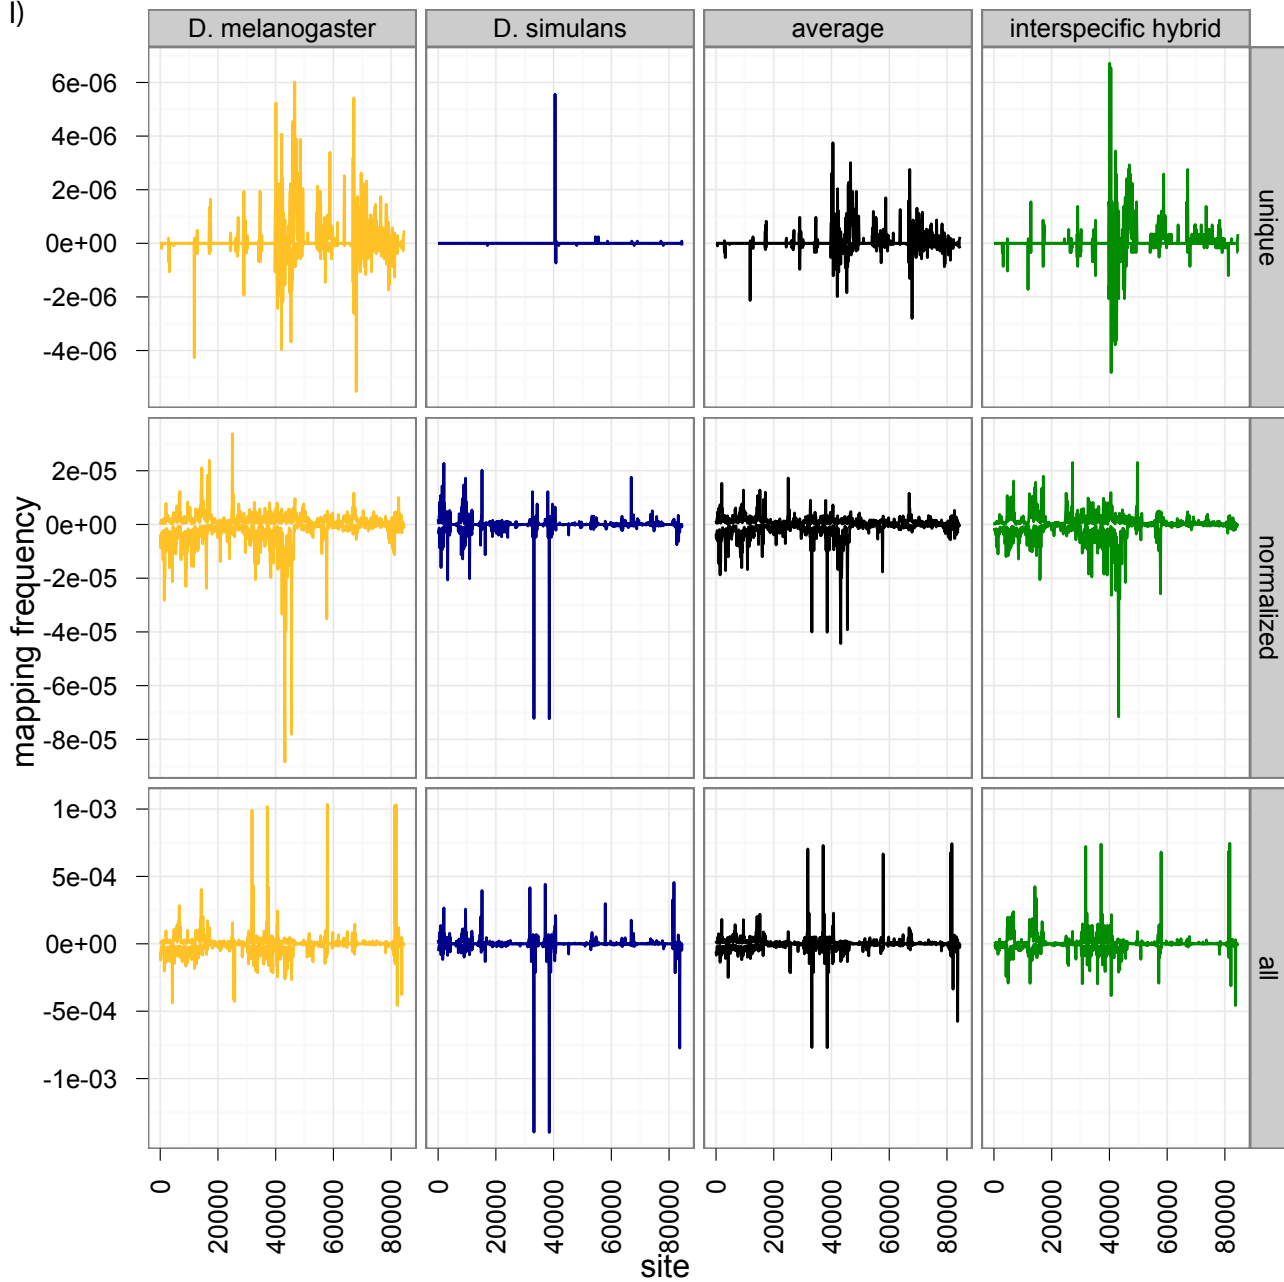

J)

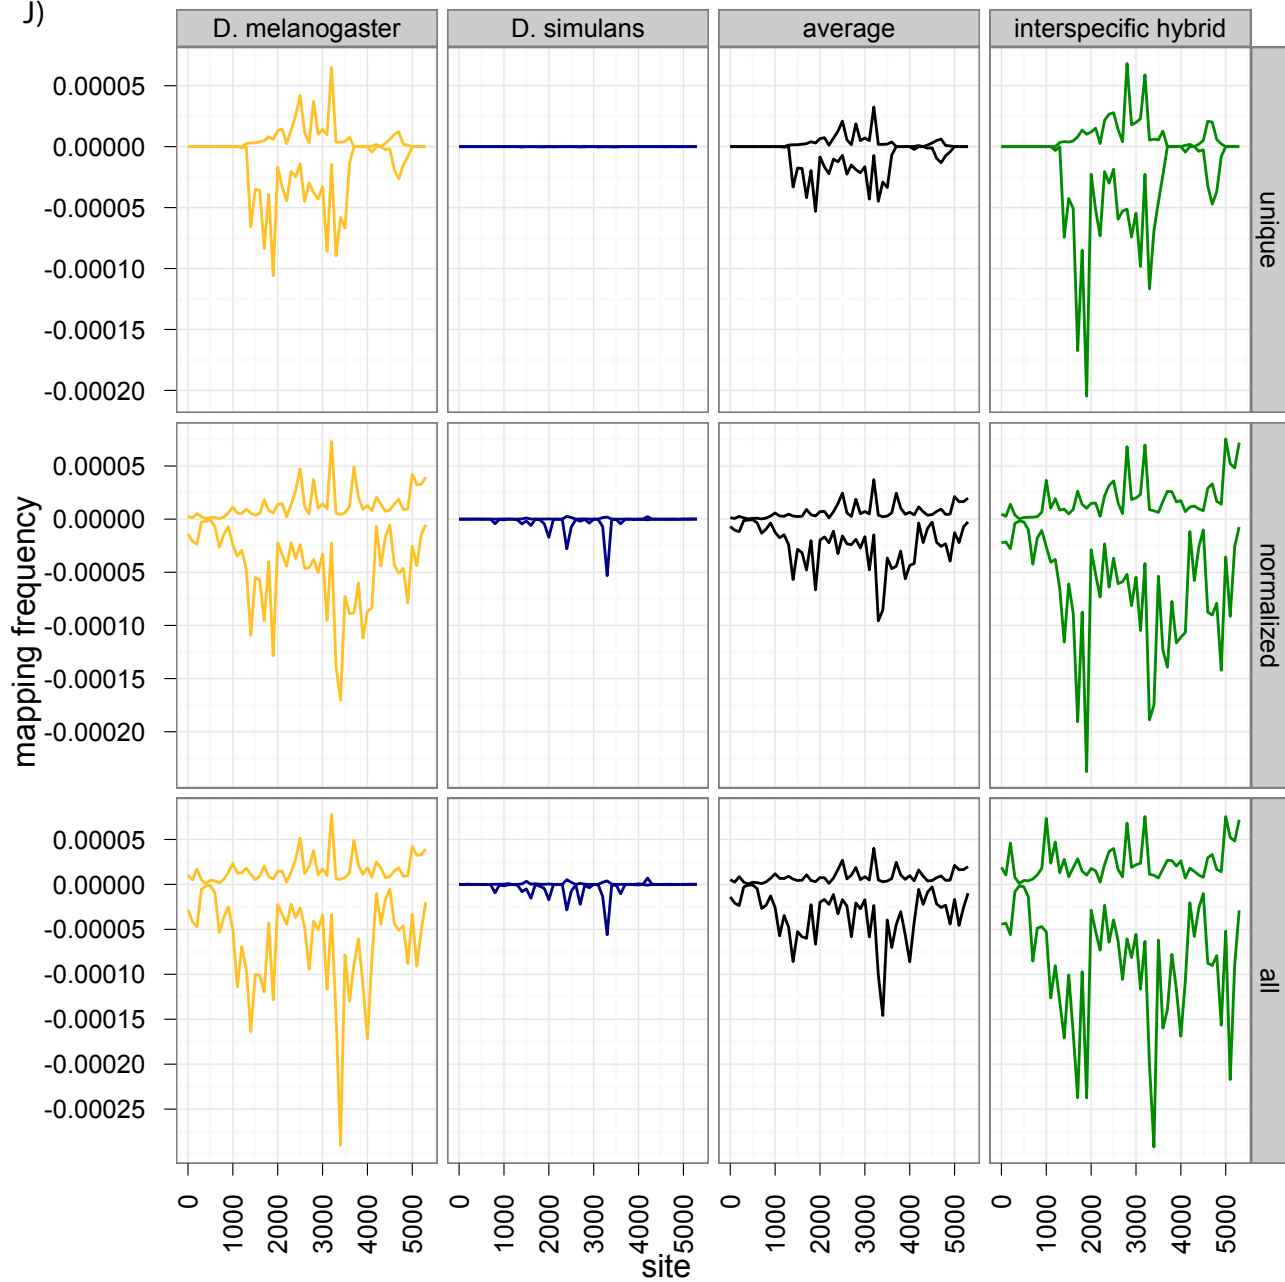

K)

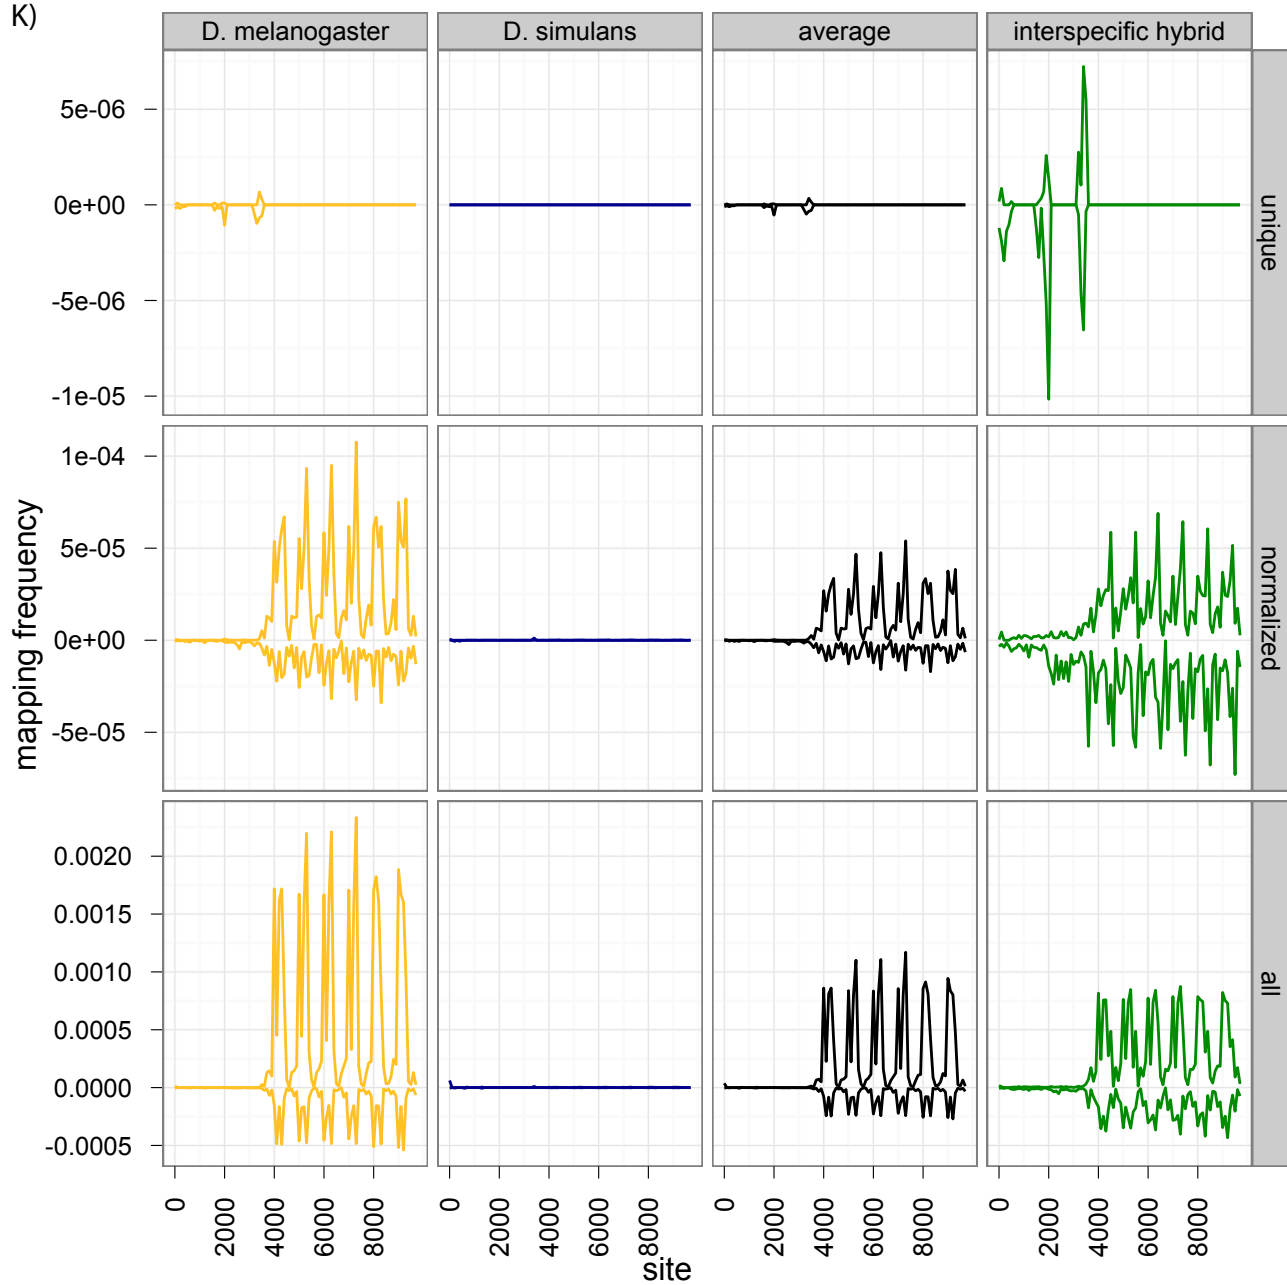

L)

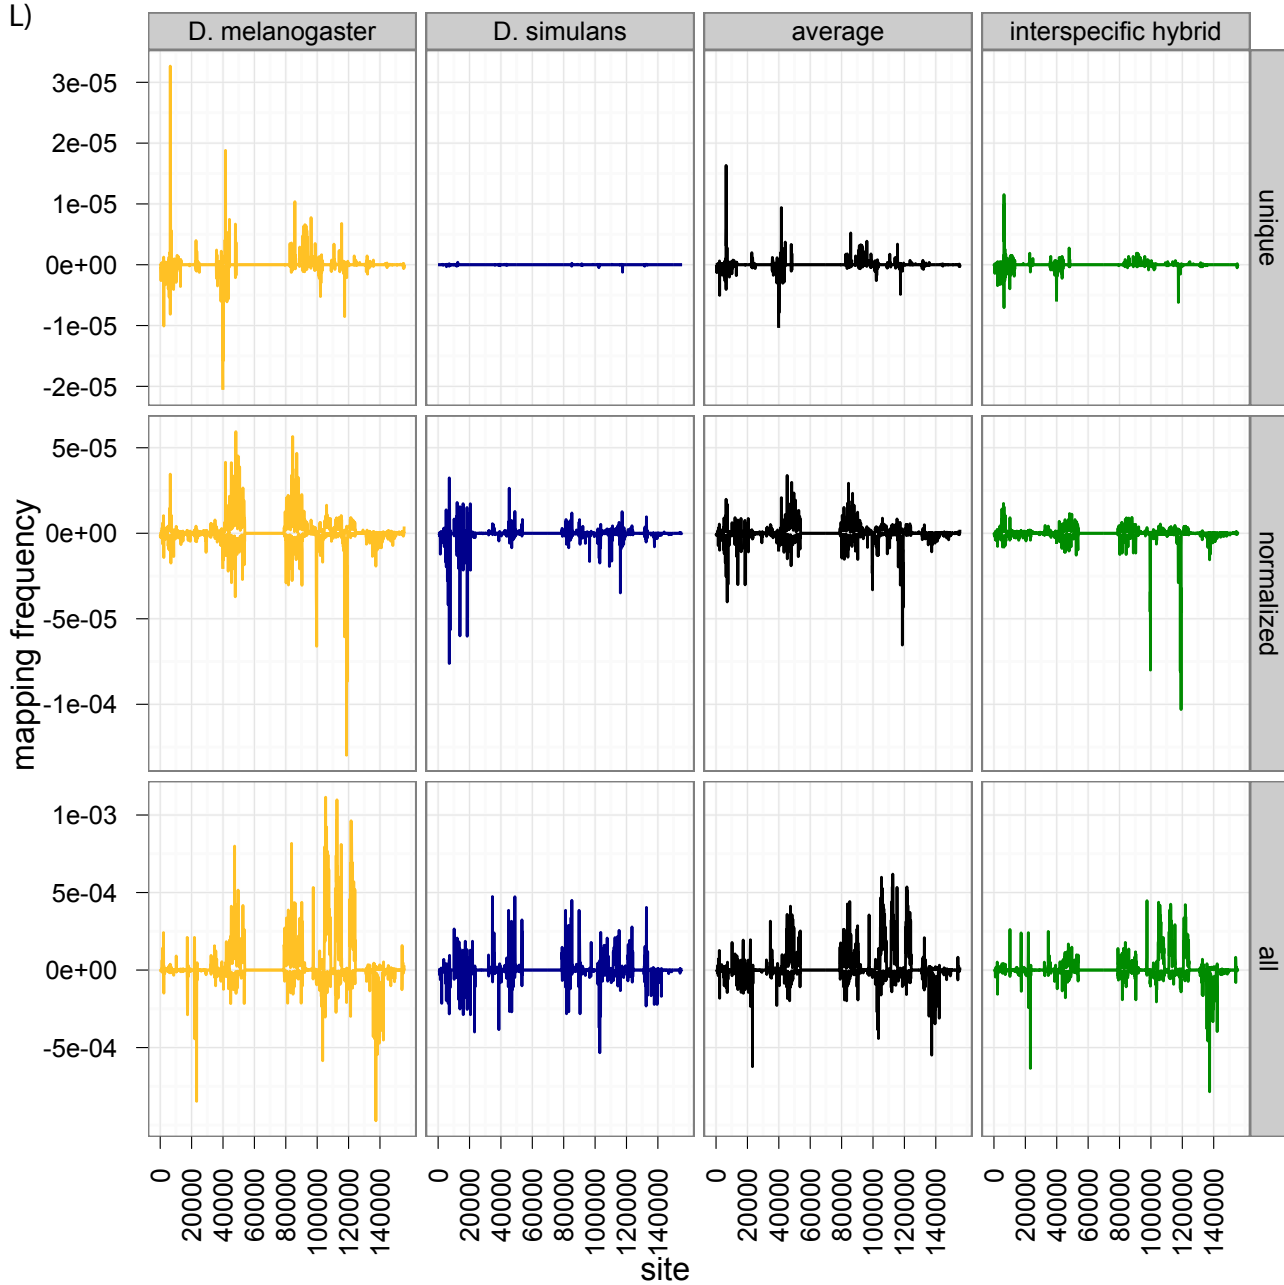

M)

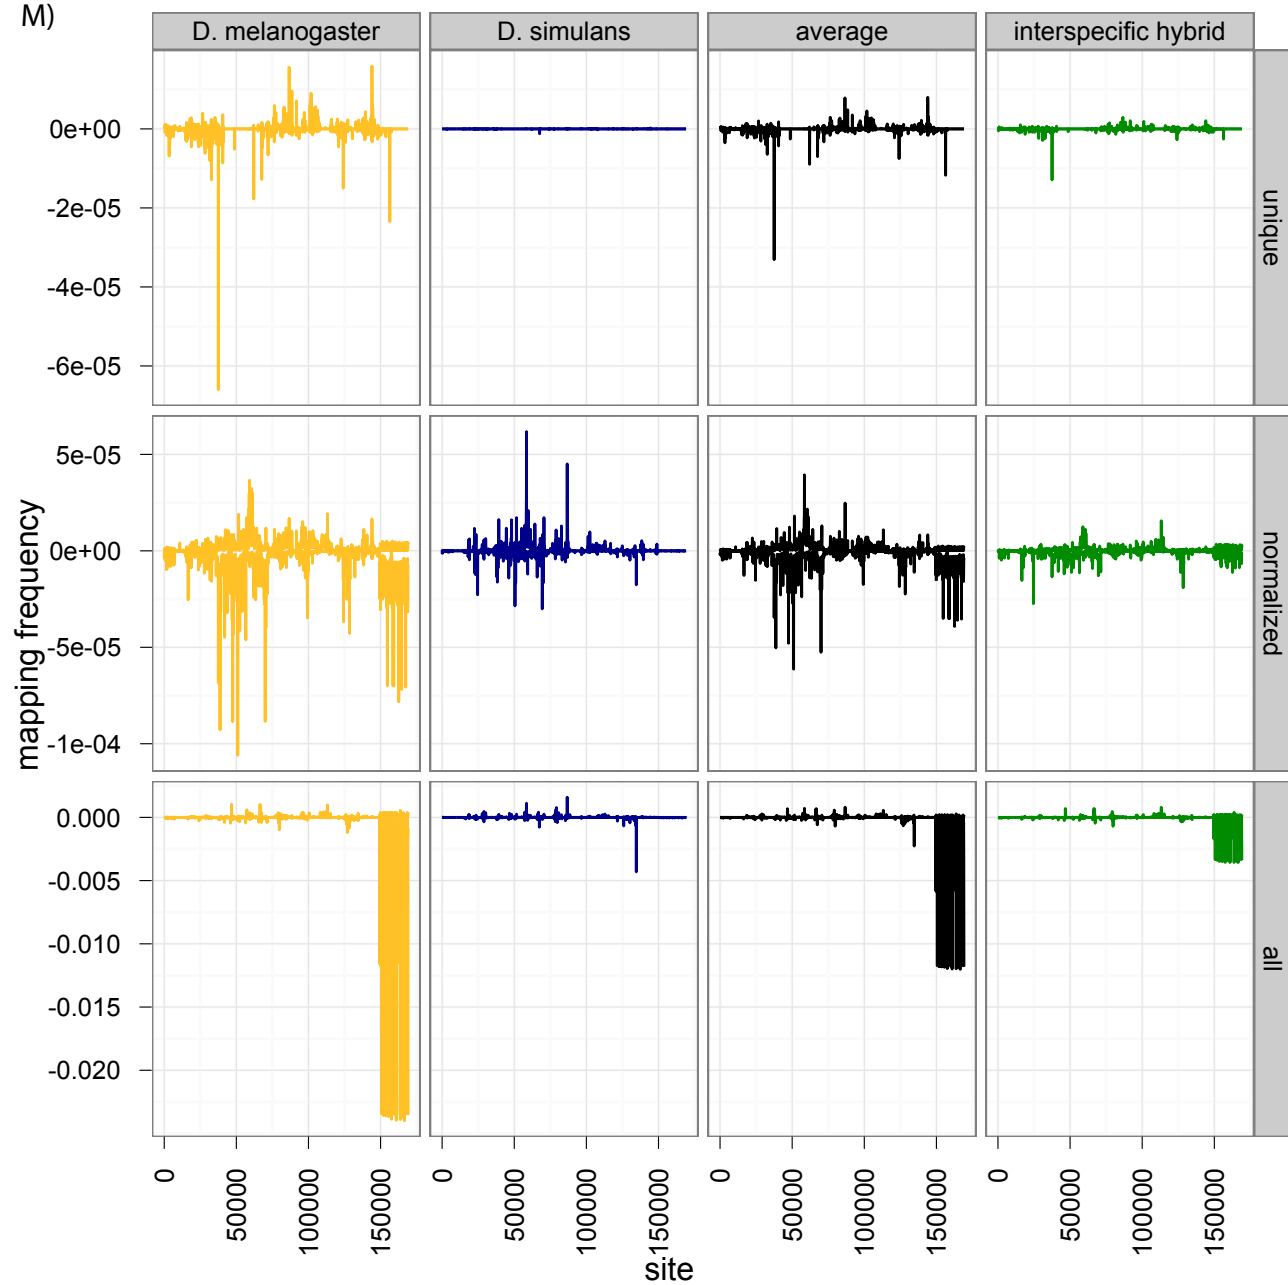



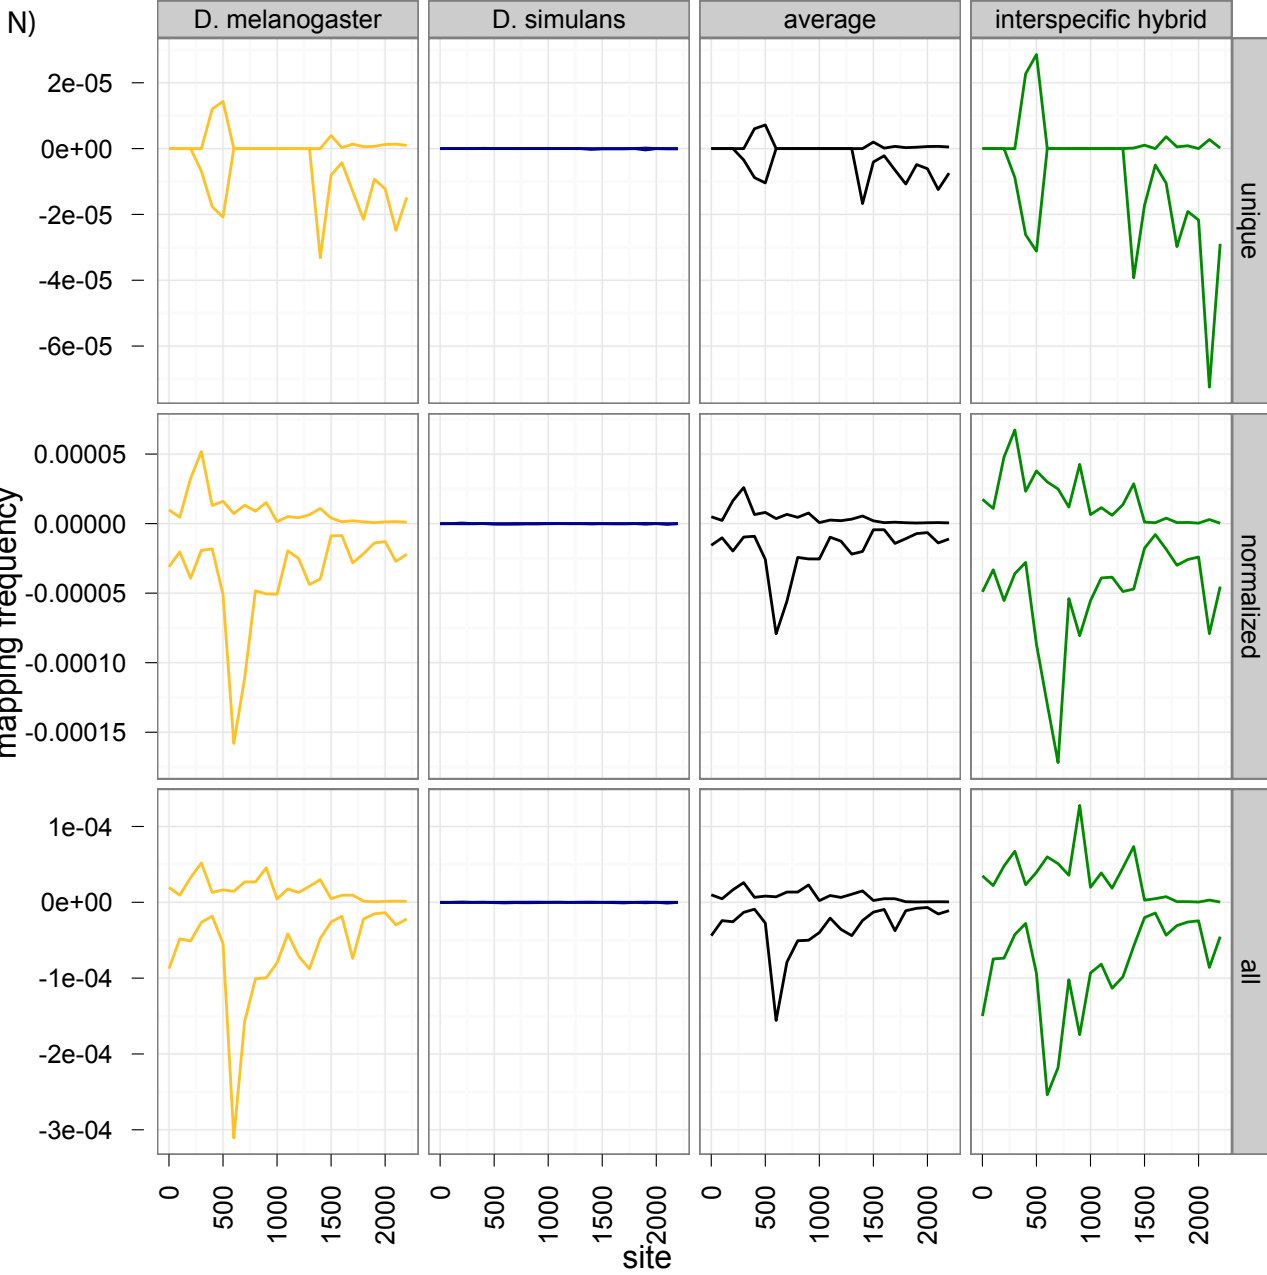

O)

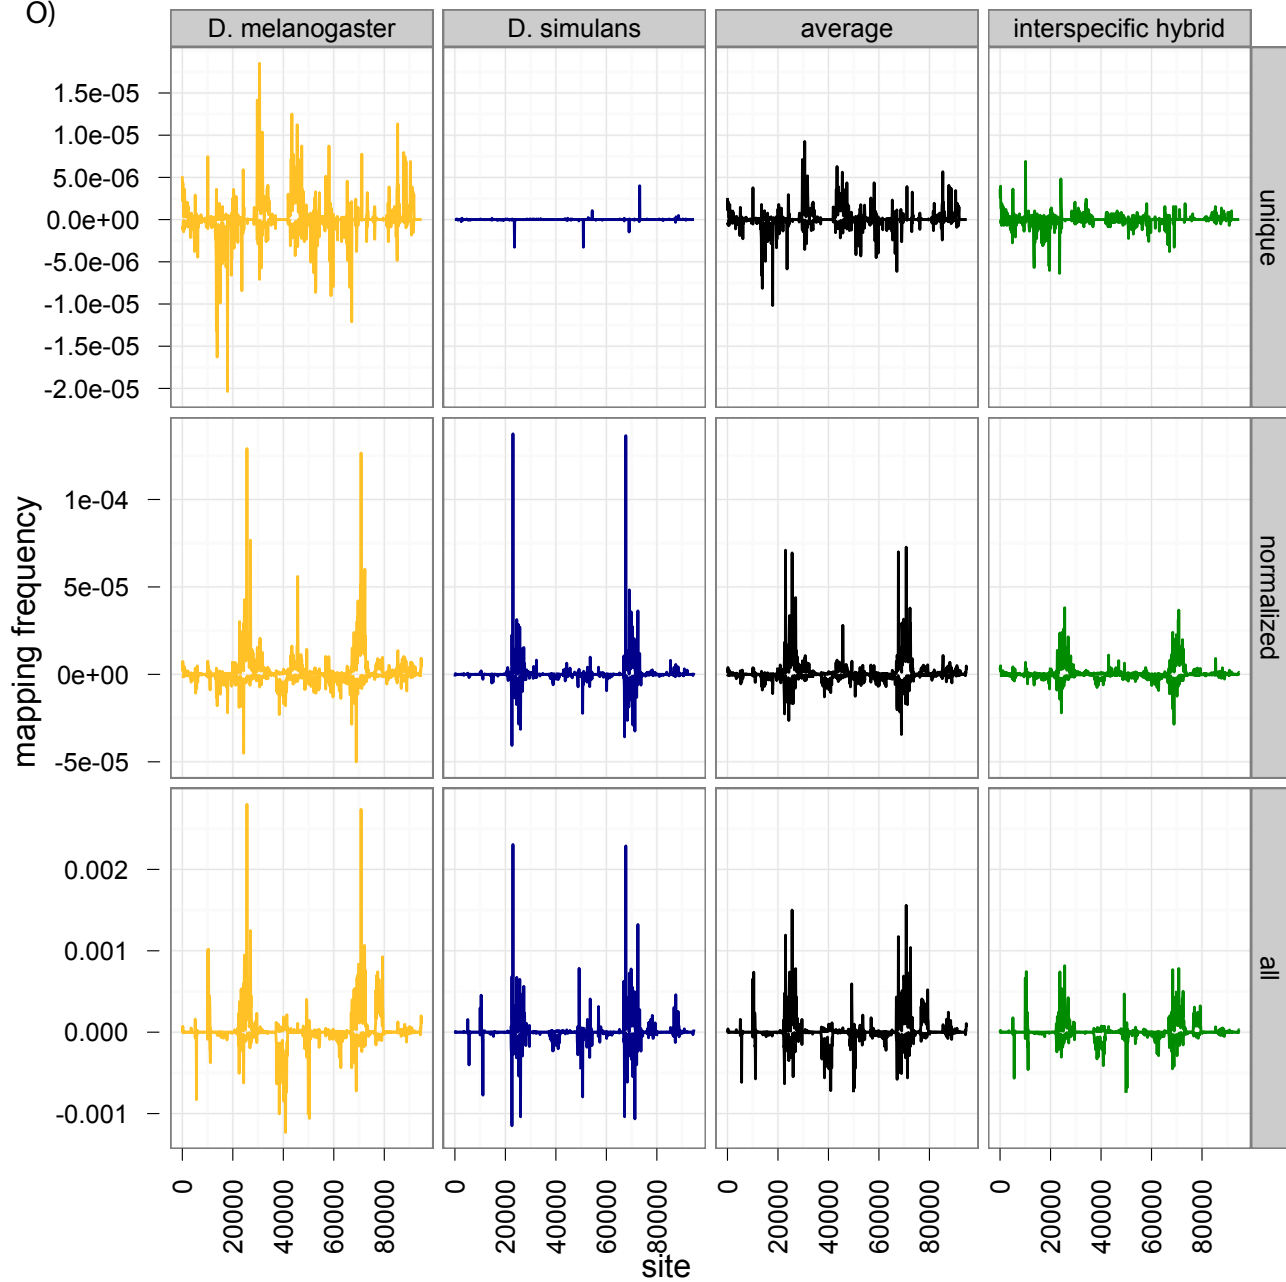

Supplement: pbio.1001428.s004.pdf [file pbio.1001428.s004.pdf]
