# Supplementary material for: Drosophila Interspecific Hybrids Phenocopy piRNA-Pathway Mutants
Source: PLoS Biol. 2012 Nov 20;10(11):e1001428. doi: 10.1371/journal.pbio.1001428 (PMC3506263; doi:10.1371/journal.pbio.1001428)
Supplement: Table S2 — Relative expression of piRNA effector protein genes in Drosophila interspecific hybrids. “FBgn” and “Symbol” denote the fly base gene id and symbol of the piRNA effector protein. “log2FC” denotes log 2 transformed normalized fold-change between the indicated genotypes. “Significant” indicates whether the preceding comparison represents a significant difference in gene expression, q-value<0.05. “Mel” indicates D. melanogaster, “sim” indicates D. simulans, and “hyb” indicates interspecific hybrid. (XLSX) [file pbio.1001428.s013.xlsx]

## Sheet: Sheet1
FBgn	Symbol	log2FC mel vs sim	significant	log2FC mel vs hybrid	significant	log2FC sim vs hybrid	significant
FBgn0250816	argonaute-3	1.00778	TRUE	0.135068	FALSE	-0.872708	TRUE
FBgn0041164	armi	0.186283	FALSE	0.317884	TRUE	0.131601	FALSE
FBgn0000146	aubergine	0.32092	FALSE	0.459593	TRUE	0.138673	FALSE
FBgn0037205	BoYb	0.54107	TRUE	2.00705	TRUE	1.46598	TRUE
FBgn0015925	capsuleen	-0.32561	TRUE	-0.252008	FALSE	0.0736023	FALSE
FBgn0000928	fs(1)Yb	-4.02733	FALSE	-3.74218	FALSE	0.285144	FALSE
FBgn0034098	krimper	-0.574506	TRUE	-0.130177	FALSE	0.444329	TRUE
FBgn0016034	maelstrom	0.464365	TRUE	0.395498	TRUE	-0.0688672	FALSE
FBgn0031401	papi	0.0103851	FALSE	0.102512	FALSE	0.0921264	FALSE
FBgn0033686	pimet	0.991081	TRUE	-0.445642	FALSE	-1.43672	TRUE
FBgn0004872	piwi	-0.74206	TRUE	-0.237843	TRUE	0.504217	TRUE
FBgn0038628	qin	0.480466	FALSE	0.695221	FALSE	0.214755	FALSE
FBgn0038633	qin	-0.54881	FALSE	0.416245	FALSE	0.965055	TRUE
FBgn0004400	rhino	-0.585106	TRUE	0.804061	TRUE	1.38917	TRUE
FBgn0003401	shutdown	-0.0888904	FALSE	0.100134	FALSE	0.189025	FALSE
FBgn0051755	SoYb	-0.0348438	FALSE	-0.0144966	FALSE	0.0203472	FALSE
FBgn0003483	spnE	0.265264	TRUE	0.233581	TRUE	-0.031683	FALSE
FBgn0002652	squash	0.813289	TRUE	0.149375	FALSE	-0.663914	TRUE
FBgn0033921	tejas	1.11101	TRUE	0.586533	TRUE	-0.524481	TRUE
FBgn0003970	vasa	1.05623	TRUE	0.804919	TRUE	-0.251307	TRUE
FBgn0039018	vreteno	0.409992	TRUE	0.507162	TRUE	0.0971694	FALSE
FBgn0032389	zucchini	-0.0609841	FALSE	0.316709	FALSE	0.377694	FALSE
