# Supplementary material for: Drosophila Interspecific Hybrids Phenocopy piRNA-Pathway Mutants
Source: PLoS Biol. 2012 Nov 20;10(11):e1001428. doi: 10.1371/journal.pbio.1001428 (PMC3506263; doi:10.1371/journal.pbio.1001428)
Supplement: Table S8 — Redundant TE consensus sequences between repbase and piler-DF. All redundant TEs were treated as the same family. Assigned group name indicates the naming convention for the current study. (XLSX) [file pbio.1001428.s019.xlsx]

## Sheet: Sheet1
Table S4. Redundant TEs from Repbase and Piler-DF predictions. TE annotations are from (S10-S12).
assigned group name
agam.group.1	agam.1.359.centroid	agam.55.91.centroid
agam.group.2	agam.102.96.centroid	agam.128.147.centroid
agam.group.3	agam.129.150.centroid	agam.198.297.centroid	agam.76.54.centroid
agam.group.4	agam.14.314.centroid	agam.14.133.centroid
agam.group.5	agam.151.196.centroid	agam.97.88.centroid
agam.group.6	agam.170.240.centroid	agam.197.293.centroid	agam.169.237.centroid
agam.group.7	agam.176.255.centroid	agam.108.109.centroid
agam.group.8	agam.184.276.centroid	agam.35.233.centroid
agam.group.9	agam.185.277.centroid	agam.129.150.centroid
agam.group.10	agam.187.279.centroid	agam.50.161.centroid
agam.group.11	agam.19.236.centroid	agam.19.298.centroid
agam.group.12	agam.20.294.centroid	agam.20.265.centroid
agam.group.13	agam.203.309.centroid	agam.31.246.centroid	agam.95.84.centroid
agam.group.14	agam.204.312.centroid	agam.62.10.centroid
agam.group.15	agam.21.270.centroid	agam.21.103.centroid
agam.group.16	agam.22.68.centroid	agam.22.288.centroid
agam.group.17	agam.228.353.centroid	agam.52.87.centroid	agam.52.99.centroid	agam.111.112.centroid
agam.group.18	agam.234.362.centroid	agam.68.28.centroid
agam.group.19	agam.24.251.centroid	agam.24.206.centroid	agam.91.79.centroid
agam.group.20	agam.24.51.centroid	agam.24.280.centroid
agam.group.21	agam.26.23.centroid	agam.26.187.centroid
agam.group.22	agam.28.269.centroid	agam.28.5.centroid
agam.group.23	agam.29.259.centroid	agam.29.247.centroid
agam.group.24	agam.32.245.centroid	agam.32.104.centroid	agam.32.204.centroid
agam.group.25	agam.33.136.centroid	agam.33.242.centroid	agam.141.179.centroid
agam.group.26	agam.35.234.centroid	agam.35.233.centroid
agam.group.27	agam.36.80.centroid	agam.36.229.centroid
agam.group.28	agam.37.209.centroid	agam.37.227.centroid
agam.group.29	agam.38.218.centroid	agam.181.268.centroid
agam.group.30	agam.42.205.centroid	agam.42.27.centroid
agam.group.31	agam.45.186.centroid	agam.45.189.centroid
agam.group.32	agam.46.20.centroid	agam.46.170.centroid	agam.46.160.centroid
agam.group.33	agam.48.47.centroid	agam.48.171.centroid
agam.group.34	agam.49.142.centroid	agam.49.166.centroid
agam.group.35	agam.5.46.centroid	agam.5.178.centroid	agam.5.114.centroid
agam.group.36	agam.50.161.centroid	agam.50.26.centroid	agam.187.279.centroid
agam.group.37	agam.52.99.centroid	agam.52.87.centroid	agam.52.48.centroid	agam.208.317.centroid	agam.52.141.centroid	agam.228.353.centroid
agam.group.38	agam.56.85.centroid	agam.56.77.centroid
agam.group.39	agam.58.2.centroid	agam.153.199.centroid
agam.group.40	agam.6.231.centroid	agam.6.167.centroid	agam.6.65.centroid	agam.6.219.centroid	agam.6.336.centroid	agam.6.257.centroid
agam.group.41	agam.80.61.centroid	agam.88.75.centroid
BARI1	BARI1	dpse.0.110.centroid
BEL	BEL_LTR	dmel.24.28.centroid	BEL_I
BS	BS	dmel.29.41.centroid
dana.group.1	dana.0.253.centroid	dana.0.56.centroid	dana.23.208.centroid
dana.group.2	dana.1.245.centroid	dana.1.270.centroid
dana.group.3	dana.100.157.centroid	dana.99.156.centroid
dana.group.4	dana.117.200.centroid	dana.43.30.centroid
dana.group.5	dana.12.240.centroid	dana.42.29.centroid	dana.5.0.centroid	dana.5.1.centroid	dana.5.101.centroid	dana.5.127.centroid	dana.5.128.centroid
dana.group.5 (cont'd)	dana.5.13.centroid	dana.5.135.centroid	dana.5.14.centroid	dana.5.140.centroid	dana.5.144.centroid	dana.5.151.centroid	dana.5.211.centroid
Table S4. Redundant TEs from Repbase and Piler-DF predictions (cont'd)
assigned group name
dana.group.5 (cont'd)	dana.5.214.centroid	dana.5.248.centroid	dana.5.254.centroid	dana.5.256.centroid	dana.5.27.centroid	dana.5.3.centroid	dana.5.79.centroid
dana.group.5 (cont'd)	dana.73.104.centroid	dyak.0.3.centroid
dana.group.6	dana.12.34.centroid	dana.12.240.centroid
dana.group.7	dana.121.212.centroid	dana.91.137.centroid
dana.group.8	dana.126.223.centroid	dana.22.76.centroid
dana.group.9	dana.13.192.centroid	dana.13.235.centroid
dana.group.10	dana.14.41.centroid	dana.14.231.centroid
dana.group.11	dana.146.273.centroid	dana.4.262.centroid
dana.group.12	dana.15.108.centroid	dana.15.39.centroid	dana.15.189.centroid	dana.15.230.centroid	dmel.3.9.centroid	dana.15.54.centroid	dana.15.122.centroid
dana.group.13	dana.15.230.centroid	dana.15.54.centroid	dana.15.189.centroid	dana.15.122.centroid
dana.group.14	dana.16.120.centroid	dana.16.16.centroid	dana.16.229.centroid	dana.16.124.centroid	dana.16.8.centroid
dana.group.15	dana.17.58.centroid	dana.17.134.centroid	dana.17.224.centroid	dana.17.84.centroid
dana.group.16	dana.18.171.centroid	dana.18.216.centroid	dana.14.231.centroid
dana.group.17	dana.18.216.centroid	dana.18.221.centroid
dana.group.18	dana.21.63.centroid	dana.21.210.centroid
dana.group.19	dana.27.172.centroid	dana.27.146.centroid
dana.group.20	dana.28.138.centroid	dana.28.163.centroid
dana.group.21	dana.29.162.centroid	dana.29.130.centroid	dana.105.167.centroid
dana.group.22	dana.3.236.centroid	dana.65.89.centroid
dana.group.23	dana.30.150.centroid	dana.30.33.centroid
dana.group.24	dana.33.94.centroid	dana.33.28.centroid	dana.127.225.centroid
dana.group.25	dana.36.11.centroid	dana.24.47.centroid
dana.group.26	dana.4.175.centroid	dana.4.174.centroid	dana.4.262.centroid
dana.group.27	dana.49.52.centroid	dana.72.102.centroid
dana.group.28	dana.7.188.centroid	dana.7.180.centroid	dana.7.259.centroid
dana.group.29	dana.80.113.centroid	dana.74.105.centroid
dana.group.30	dana.9.24.centroid	dana.9.75.centroid	dana.9.252.centroid
dana.group.31	dana.96.153.centroid	dana.32.126.centroid	dana.32.43.centroid
dere.group.1	dere.3.3.centroid	dere.11.11.centroid
dere.group.2	dere.7.7.centroid	dana.139.258.centroid
dere.group.3	dere.8.8.centroid	dere.6.6.centroid
dere.group.4	dgri.230.284.centroid	dgri.50.228.centroid
DIVER	DIVER_LTR	dmel.26.34.centroid	DIVER_I
412	DM412_I	dmel.5.32.centroid	dmel.5.31.centroid	DM412B_LTR
NOMAD	dmel.0.47.centroid	dmel.0.16.centroid	NOMAD_I	NOMAD_LTR
BURDOCK	dmel.1.19.centroid	BURDOCK_I	BURDOCK_LTR	dmel.1.46.centroid
DOC6	dmel.10.1.centroid	DOC6_DM
BLOOD	dmel.13.5.centroid	BLOOD_I	BLOOD_LTR
I	dmel.14.7.centroid	I_DM
BLASTOPIA	dmel.17.11.centroid	BLASTOPIA_I	BLASTOPIA_LTR
COPIA	dmel.19.15.centroid	COPIA_DM_I	COPIA_DM_LTR
FW	dmel.2.0.centroid	FW
DMRT1B	dmel.22.26.centroid	DMRT1B
BARI_DM	dmel.25.33.centroid	BARI_DM
DMRT1A	dmel.27.38.centroid	DMRT1A
INVADER1_I	dmel.30.42.centroid	INVADER1_LTR	INVADER1_I
BS2	dmel.31.43.centroid	BS2
GYPSY	dmel.34.48.centroid	GYPSY_LTR	GYPSY_I
Jockey	dmel.4.2.centroid	Jockey
ROO	dmel.8.13.centroid	dmel.8.17.centroid	dmel.8.24.centroid	ROO_I	ROO_LTR
Table S4. Redundant TEs from Repbase and Piler-DF predictions (cont'd)
assigned group name
DM297	dmel.9.21.centroid	DM297_I	DM297_LTR
PROTOP	DMHMR1	PROTOP	dmel.7.14.centroid
dmoj.group.1	dmoj.2.74.centroid	dmoj.2.91.centroid
dmoj.group.2	dmoj.4.88.centroid	dmoj.4.42.centroid
dmoj.group.3	dmoj.44.76.centroid	dmoj.52.97.centroid
dmoj.group.4	dmoj.5.28.centroid	dmoj.5.80.centroid
dmoj.group.5	dmoj.6.18.centroid	dmoj.6.78.centroid
dmoj.group.6	dmoj.7.20.centroid	dmoj.7.58.centroid	dwil.7.2.centroid	dyak.0.5.centroid	dyak.0.44.centroid	dwil.7.31.centroid	dyak.0.6.centroid
dmoj.group.6 (cont'd)	dwil.7.28.centroid	dwil.7.117.centroid	dyak.0.47.centroid	dyak.0.35.centroid	dyak.0.22.centroid
dper.group.1	dper.0.0.centroid	dpse.4.37.centroid
dper.group.2	dper.18.18.centroid	dper.22.22.centroid	dper.27.27.centroid	dper.5.5.centroid	dpse.1.1.centroid	dpse.1.105.centroid	dpse.1.16.centroid
dper.group.2 (cont'd)	dpse.1.17.centroid	dpse.1.20.centroid	dpse.1.22.centroid	dpse.1.30.centroid	dpse.1.41.centroid	dpse.1.56.centroid	dpse.1.60.centroid
dper.group.2 (cont'd)	dpse.1.64.centroid	dpse.1.65.centroid	dpse.1.69.centroid	dpse.1.79.centroid	dpse.1.84.centroid	dpse.1.88.centroid	dpse.1.9.centroid
dper.group.2 (cont'd)	dpse.55.112.centroid
dper.group.3	dper.32.32.centroid	dpse.50.106.centroid
dpse.group.1	dpse.0.103.centroid	dpse.0.110.centroid
dpse.group.2	dpse.1.17.centroid	dper.27.27.centroid	dpse.1.16.centroid	dpse.1.102.centroid	dpse.1.20.centroid	dper.18.18.centroid	dper.11.11.centroid
dpse.group.2 (cont'd)	dpse.1.88.centroid	dpse.1.95.centroid	dpse.55.112.centroid
dpse.group.3	dpse.1.9.centroid	dpse.1.69.centroid	dpse.1.17.centroid	dpse.1.20.centroid	dpse.1.102.centroid	dpse.1.65.centroid	dpse.1.22.centroid
dpse.group.3 (cont'd)	dper.5.5.centroid	dpse.1.105.centroid	dpse.1.54.centroid	ISFUN1
dpse.group.4	dpse.10.40.centroid	dper.16.16.centroid
dpse.group.5	dpse.11.3.centroid	dpse.11.34.centroid
dpse.group.6	dpse.24.44.centroid	dpse.14.24.centroid	dpse.5.57.centroid	dpse.39.85.centroid
dpse.group.7	dpse.29.55.centroid	dpse.13.21.centroid
dpse.group.8	dpse.47.100.centroid	dper.31.31.centroid
DIVER2	dsec.1.1.centroid	DIVER2_I	DIVER2_LTR
R1	dsec.9.9.centroid	R1_DM
dsim.group.1	dsim.2.2.centroid	dsec.21.21.centroid	dsim.3.3.centroid	dsim.1.1.centroid	dsec.24.24.centroid	dsec.4.4.centroid	dsim.2.2.centroid
dsim.group.1(cont'd)	dsec.21.21.centroid	dsim.3.3.centroid	dsim.1.1.centroid	dsec.24.24.centroid	dsec.4.4.centroid
dsim.group.2	dsim.6.6.centroid	dsec.15.15.centroid	dsec.15.15.centroid
dvir.group.1	dvir.0.10.centroid	dvir.0.100.centroid	dvir.0.14.centroid	dvir.0.18.centroid	dvir.0.42.centroid	dvir.0.5.centroid	dvir.0.74.centroid
dvir.group.1 (cont'd)	dvir.0.85.centroid
dvir.group.2	dvir.13.52.centroid	dvir.13.20.centroid	dvir.13.0.centroid	dvir.13.51.centroid
dvir.group.3	dvir.15.21.centroid	dvir.15.30.centroid	dvir.14.34.centroid
dvir.group.4	dvir.16.2.centroid	dvir.16.17.centroid	dvir.11.23.centroid	dvir.11.33.centroid
dvir.group.5	dvir.2.37.centroid	TV1I	dvir.2.36.centroid	dvir.2.95.centroid	dvir.2.28.centroid	dvir.2.49.centroid	TV1LTR
dvir.group.5 (cont'd)	dvir.2.53.centroid
dvir.group.6	dvir.21.15.centroid	ULYSSES_LTR
dvir.group.7	dvir.33.77.centroid	dvir.39.99.centroid
dvir.group.8	dvir.4.73.centroid	dvir.4.71.centroid
dvir.group.9	dvir.5.67.centroid	dvir.5.86.centroid	dvir.5.60.centroid	dvir.5.70.centroid
dvir.group.10	dvir.7.35.centroid	dvir.7.88.centroid
dwil.group.1	dwil.0.124.centroid	dwil.0.143.centroid
dwil.group.2	dwil.1.142.centroid	dwil.1.25.centroid	dwil.1.26.centroid	dwil.57.43.centroid	dwil.7.110.centroid	dwil.7.136.centroid	dwil.7.2.centroid
dwil.group.2 (cont'd)	dwil.7.28.centroid	dwil.7.31.centroid	dwil.7.5.centroid
dwil.group.3	dwil.18.119.centroid	dwil.18.104.centroid	dwil.18.19.centroid	dwil.18.41.centroid
dwil.group.4	dwil.20.115.centroid	MAR_DW
dwil.group.5	dwil.25.99.centroid	dwil.25.107.centroid
dwil.group.6	dwil.28.21.centroid	dwil.28.64.centroid	dwil.28.35.centroid
dwil.group.7	dwil.3.87.centroid	dwil.3.140.centroid	dwil.3.59.centroid
Table S4. Redundant TEs from Repbase and Piler-DF predictions (cont'd)
assigned group name
dwil.group.8	dwil.39.79.centroid	dwil.39.8.centroid
dwil.group.9	dwil.41.76.centroid	dwil.41.50.centroid
dwil.group.10	dwil.6.22.centroid	dwil.6.100.centroid	dwil.6.108.centroid	dwil.6.91.centroid	dwil.6.27.centroid	dwil.6.123.centroid	dwil.6.62.centroid
dwil.group.10 (cont'd)	dwil.6.97.centroid	dwil.6.55.centroid	dwil.6.94.centroid	dwil.6.63.centroid	dwil.6.91.centroid	dwil.6.108.centroid	dwil.6.22.centroid
dwil.group.10 (cont'd)	dwil.6.94.centroid	dwil.6.27.centroid	dwil.6.97.centroid	dwil.6.55.centroid	dwil.6.11.centroid	dwil.6.62.centroid	dwil.6.100.centroid
dwil.group.10 (cont'd)	dwil.6.22.centroid	dwil.6.91.centroid	dwil.6.108.centroid	dwil.6.94.centroid	dwil.6.27.centroid	dwil.6.123.centroid	dwil.6.62.centroid
dwil.group.10 (cont'd)	dwil.6.55.centroid	dwil.6.4.centroid	dwil.6.97.centroid	dwil.6.11.centroid	dwil.6.63.centroid	dwil.6.62.centroid	dwil.6.90.centroid
dwil.group.10 (cont'd)	dwil.6.55.centroid	dwil.6.123.centroid	dwil.6.97.centroid	dwil.6.63.centroid	dwil.6.100.centroid	dwil.6.91.centroid
dwil.group.11	dwil.67.7.centroid	dwil.10.132.centroid	dwil.28.21.centroid	dmoj.1.86.centroid	dmoj.1.7.centroid	dmoj.1.49.centroid	dwil.12.127.centroid
dwil.group.12	dwil.68.3.centroid	dwil.26.106.centroid
dyak.group.1	dyak.0.27.centroid	dyak.0.24.centroid	dyak.0.6.centroid	dyak.0.40.centroid	dyak.0.5.centroid	dyak.0.44.centroid	dyak.0.0.centroid
dyak.group.1 (cont'd)	dyak.0.39.centroid	dyak.0.26.centroid	dyak.0.8.centroid	dyak.0.45.centroid	dyak.0.7.centroid	dyak.0.23.centroid	dyak.0.15.centroid
dyak.group.1 (cont'd)	dyak.0.35.centroid	dyak.0.32.centroid	dyak.0.47.centroid	DNAREP1_DM	dyak.0.3.centroid	dyak.0.20.centroid	dyak.0.22.centroid
dyak.group.1 (cont'd)	dyak.7.11.centroid	dyak.0.36.centroid	dyak.0.12.centroid	dwil.7.117.centroid	dyak.17.41.centroid
dyak.group.2	dyak.1.13.centroid	dyak.1.31.centroid
dyak.group.3	dyak.14.34.centroid	dmel.18.12.centroid	MDG3_DM
dyak.group.4	dyak.2.16.centroid	dyak.2.9.centroid
GYPSY_3	GYPSY3_LTR	dmel.21.22.centroid	GYPSY3_I	Gypsy1-I_DM
HMSBEAGLE	HMSBEAGLE_I	dmel.20.18.centroid
HOBO	HOBO	dmel.15.8.centroid
M4DM	M4DM	dmel.12.4.centroid
MINOS	MINOS	dmoj.11.0.centroid
NTS_DM	NTS_DM	dsec.3.3.centroid
POGO	POGON1	dmel.28.40.centroid	POGO
QUASIMODO_I	QUASIMODO_I	dmel.23.27.centroid
S_DM	S_DM	dmel.11.3.centroid
SAR2_DM	SAR2_DM	dyak.8.14.centroid
TABOR	TABOR_LTR	dsim.0.0.centroid	TABOR_I
TIRANT	TIRANT_I	dmel.6.30.centroid	dmel.6.25.centroid	TIRANT_LTR
TRAM	TRAM_LTR	dpse.9.45.centroid	dpse.9.11.centroid	TRAM_I
TRANSPAC	TRANSPAC_I	dmel.16.10.centroid	TRANSPAC_LTR
WORF	WORF_DMi	dpse.8.28.centroid
